# Supplementary material for: A Novel Computational Model of the Rabbit Atrial Cardiomyocyte With Spatial Calcium Dynamics
Source: PubMed Central journal article supplement (PMC7583320; doi:10.3389/fphys.2020.556156), 2020-10-09
Supplement: Data_Sheet_1.pdf [file Data_Sheet_1.pdf]

## Supplementary Material

### 1 $\text{Na}^+$ - $\text{Ca}^{2+}$ EXCHANGER MODEL

$$I_{\text{NCX}} = I_{\text{NCX}}^{\text{max}} \cdot \frac{1}{1 + \left(\frac{k_{\text{dact}}}{\text{Ca}_i}\right)^2} \cdot \frac{e^{\frac{\nu V_m F}{RT}} \cdot \text{Ca}_o \cdot \text{Na}_i^3 - e^{\frac{(\nu-1)V_m F}{RT}} \cdot \text{Na}_o^3 \cdot \text{Ca}_i}{K m_{\text{Ca}_i} \cdot \text{Na}_o^3 \left(1 + \left(\frac{\text{Na}_i}{K m_{\text{Na}_i}}\right)^3\right) + K m_{\text{Na}_o}^3 \cdot \text{Ca}_i \cdot \left(1 + \frac{\text{Ca}_i}{K m_{\text{Ca}_i}}\right) + (K m_{\text{Ca}_o} + \text{Ca}_o) \cdot \text{Na}_i^3 + \text{Na}_o^3 \cdot \text{Ca}_i} \cdot \frac{1}{1 + k_{\text{sat}} \cdot e^{\frac{(\nu-1)V_m F}{RT}}}$$

$$I_{\text{NCX}}^{\text{max}} = 4.41 \text{ pA/pF}$$

$$k_{\text{dact}} = 0.384 \times 10^{-3} \text{ mM}$$

$$K m_{\text{Ca}_i} = 3.59 \times 10^{-3} \text{ mM}$$

$$K m_{\text{Ca}_o} = 1.3 \text{ mM}$$

$$K m_{\text{Na}_i} = 12.29 \text{ mM}$$

$$K m_{\text{Na}_o} = 87.5 \text{ mM}$$

$$\nu = 0.35$$

$$k_{\text{sat}} = 0.27$$

### 2 $\text{Ca}^{2+}$ AND $\text{Na}^+$ DIFFUSION MODEL

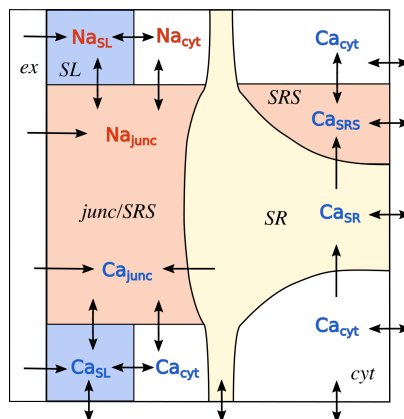

**Figure S1.** Schematic representation of  $\text{Ca}^{2+}$  and  $\text{Na}^+$  concentrations and their across the different model compartments in a membrane domain.

### 3 NA<sup>+</sup> MASS BALANCE

In the case of the simplified

$$\frac{dNa_i}{dt} = \frac{J_{NaSLmyo}}{v_{myo}} \cdot \left( (Na_{SL}^1 - Na_i) + (Na_{SL}^2 - Na_i) \right) + \frac{(Na_i^{-1} - Na_i) + (Na_i^{-2} - Na_i)}{\tau_D}$$

where  $\tau_D = 0.6$  /s is the diffusion constant.  $Na_{SL}^1$  and  $Na_{SL}^2$  are the Na<sup>+</sup> concentrations in the SL space of the membrane domains, and  $Na_i^{-1}$  and  $Na_i^{-2}$  are the Na<sup>+</sup> concentrations in the neighbouring left and right segments, respectively.  $J_{NaSLmyo}$  is the net buffered Na<sup>+</sup> flux and equals  $1.6386 \times 10^{-12}$  L/ms.

Since in this study we simulate only one segment and both membrane domains are identical, the above equation simplifies to:

$$\frac{dNa_i}{dt} = \frac{J_{NaSLmyo}}{v_{myo}} \cdot 2 \cdot (Na_{SL} - Na_i)$$

At the membrane domains, Na<sup>+</sup> is updated as:

$$\frac{dNa_{SL}}{dt} = I_{Na_{SL}}^{tot} \cdot \frac{C_m F}{v_{SL}} + J_{Na_{juncSL}} \cdot (Na_{junc} - Na_{SL}) + \frac{2 \cdot J_{NaSLmyo}}{v_{SL}} \cdot (Na_i - Na_{SL}) - Buff_{Na_{SL}}$$

$$\frac{dNa_{junc}}{dt} = I_{Na_{junc}}^{tot} \cdot \frac{C_m F}{v_{junc}} + \frac{J_{Na_{juncSL}}}{V_{junc}} \cdot (Na_{SL} - Na_{junc}) - Buff_{Na_{junc}}$$

where  $J_{Na_{juncSL}} = 1.8313 \times 10^{-14}$  l/ms is the Na<sup>+</sup> flux between the SL and junc spaces.  $Buff_{Na_{SL}}$  and  $Buff_{Na_{junc}}$  are the buffering variables of Na<sup>+</sup> in the SL and junc spaces, respectively, and are given by:

$$\frac{dBuff_{Na_{SL}}}{dt} = k_{on}^{Na} \cdot Na_{SL} \cdot (B_{Na_{SL}}^{max} - Buff_{Na_{SL}}) - k_{off}^{Na} \cdot Buff_{Na_{SL}}$$

$$\frac{dBuff_{Na_{junc}}}{dt} = k_{on}^{Na} \cdot Na_{junc} \cdot (B_{Na_{junc}}^{max} - Buff_{Na_{junc}}) - k_{off}^{Na} \cdot Buff_{Na_{junc}}$$

where  $k_{on}^{Na} = 0.0001$  and  $k_{off}^{Na} = 0.001$  are the rate constants of Na<sup>+</sup>buffer complex formation and dissociation, respectively.  $B_{Na_{SL}}^{max}$  and  $B_{Na_{junc}}^{max}$  are the maximum buffer capacities in the SL and junc spaces and are equal to 7.561 mM and 1.65 mM, respectively.

## 4 SERCA2A MODEL

$$J_{Serca} = V_{max} \cdot \frac{\left(\frac{Ca_i}{Kmf}\right)^{nh} - \left(\frac{Ca_{SR}}{Kmr}\right)^{nh}}{1 + \left(\frac{Ca_i}{Kmf}\right)^{nh} + \left(\frac{Ca_{SR}}{Kmr}\right)^{nh}}$$

$$V_{max} = 5.3 \times 10^{-3} \text{ mM/s}$$

$$Kmf = 0.000625 \text{ mM}$$

$$Kmr = 1.0 \text{ mM}$$

$$nh = 1.787$$

## 5 CA<sup>2+</sup> BUFFERS

Buffers are modelled using a two-state model:

$$\frac{dC_B}{dt} = k_{on}C(B_{max} - C_B) - k_{off}C_B$$

where  $B_{max}$  is the maximum buffer capacity,  $C$  and  $Ca_B$  represent the concentration of free and bound ligand, and  $k_{on}$  and  $k_{off}$  are the rate coefficients of ion-buffer complex formation and dissociation, respectively.

**Table S1.** Buffer parameters.

| Buffer                              | Compartment | Bmax (μM)                            | kon (/s) | koff (/μMs) |
|-------------------------------------|-------------|--------------------------------------|----------|-------------|
| Troponin C High (Ca <sup>2+</sup> ) | cytosol     | 140E-3                               | 2.37     | 3.2E-5      |
| Troponin C High (Mg <sup>2+</sup> ) | cytosol     | 140E-3                               | 3E-3     | 3.33E-3     |
| Troponin C Low                      | cytosol     | 70E-3                                | 163.5    | 98E-3       |
| Calmodulin                          | cytosol     | 2.4E-3                               | 34       | 238E-3      |
| Myosin (Ca)                         | cytosol     | 140E-3                               | 13.8     | 4.6E-4      |
| Myosin (Mg)                         | cytosol     | 140E-3                               | 0.0157   | 5.7E-5      |
| SR                                  | cytosol     | 17.1E-3                              | 100      | 6E-2        |
| SLlow                               | SL          | 37.4E-3 · $\frac{v_{myo}}{v_{SL}}$   | 100      | 1.3         |
| SLlow                               | junc        | 4.6E-4 · $\frac{v_{myo}}{v_{junc}}$  | 100      | 1.3         |
| SLhigh                              | SL          | 13.4E-3 · $\frac{v_{myo}}{v_{SL}}$   | 100      | 3E-2        |
| SLhigh                              | junc        | 1.65E-4 · $\frac{v_{myo}}{v_{junc}}$ | 100      | 3E-2        |
| Calsequestrin                       | SR          | 140E-3 · $\frac{v_{myo}}{v_{SR}}$    | 100      | 65          |
| Na <sup>+</sup>                     | SL          | 7.561                                | 1.0E-4   | 1.0E-3      |
| Na <sup>+</sup>                     | junc        | 1.65                                 | 1.0E-4   | 1.0E-3      |

## 6 INITIAL CONDITIONS

**Table S2.** Initial ionic concentrations in the different compartments of the model.

| Ionic traces       | Initial concentration | Description                                                               |
|--------------------|-----------------------|---------------------------------------------------------------------------|
| Ca <sub>cyt</sub>  | 0.21 $\mu$ M          | Ca <sup>2+</sup> concentration in the cytosol.                            |
| Ca <sub>junc</sub> | 0.073 $\mu$ M         | Ca <sup>2+</sup> concentration in the junctional domain of the SS space.  |
| Ca <sub>sl</sub>   | 0.23 $\mu$ M          | Ca <sup>2+</sup> concentration in the sarcolemmal domain of the SS space. |
| Ca <sub>SR</sub>   | 0.25 $\mu$ M          | Luminal Ca <sup>2+</sup> concentration in the sarcoplasmic reticulum.     |
| Ca <sub>SRS</sub>  | 0.073 $\mu$ M         | Ca <sup>2+</sup> concentration in the sub SR space.                       |
| Na <sub>cyt</sub>  | 11.3 mM               | Na <sup>+</sup> concentration in the cytosol (2Hz).                       |
| Na <sub>junc</sub> | 11.3 mM               | Na <sup>+</sup> concentration in the junctional domain of the SS space.   |
| Na <sub>SL</sub>   | 11.3 mM               | Na <sup>+</sup> concentration in the sarcolemmal domain of the SS space.  |
| K <sub>cyt</sub>   | 120 mM                | K <sup>+</sup> concentration in the cytosol.                              |
| Cl <sub>cyt</sub>  | 30 mM                 | Cl <sup>-</sup> concentration in the cytosol.                             |
| Ca <sub>o</sub>    | 1.8 mM                | Extracellular Ca <sup>2+</sup> concentration.                             |
| Na <sub>o</sub>    | 140 mM                | Extracellular Na <sup>+</sup> concentration.                              |
| K <sub>o</sub>     | 5.4 mM                | Extracellular K <sup>+</sup> concentration.                               |
| Cl <sub>o</sub>    | 132 mM                | Extracellular Cl <sup>-</sup> concentration.                              |

## 7 SELECTED POPULATION

**Table S3.** Parameter values of the 16 models of the calibrated population.

| G <sub>CaL</sub> | G <sub>CaT</sub> | I <sub>NaK</sub> <sup>max</sup> | I <sub>NaCa</sub> <sup>max</sup> | G <sub>Na</sub> | G <sub>to</sub> | G <sub>Kr</sub> | G <sub>Ks</sub> | G <sub>K1</sub> | I <sub>CaP</sub> <sup>max</sup> | G <sub>Cab</sub> | G <sub>Nab</sub> | G <sub>Clb</sub> |
|------------------|------------------|---------------------------------|----------------------------------|-----------------|-----------------|-----------------|-----------------|-----------------|---------------------------------|------------------|------------------|------------------|
| 0.228            | 0.415            | 2.449 E-3                       | 1.436                            | 0.088 E-3       | 0.712           | 0.120           | 0.174           | 0.623           | 0.589                           | 0.970 E-3        | 0.398 E-3        | 6.392 E-3        |
| 0.146            | 0.474            | 1.801 E-3                       | 1.162                            | 0.068 E-3       | 0.606           | 0.056           | 0.119           | 0.333           | 0.246                           | 0.506 E-3        | 0.623 E-3        | 7.647 E-3        |
| 0.192            | 0.069            | 2.425 E-3                       | 1.073                            | 0.068 E-3       | 0.443           | 0.268           | 0.058           | 0.277           | 0.401                           | 1.348 E-3        | 0.885 E-3        | 5.078 E-3        |
| 0.202            | 0.437            | 1.651 E-3                       | 3.314                            | 0.060 E-3       | 0.492           | 0.176           | 0.178           | 0.673           | 0.403                           | 1.024 E-3        | 0.612 E-3        | 8.786 E-3        |
| 0.295            | 0.124            | 2.573 E-3                       | 1.165                            | 0.071 E-3       | 0.790           | 0.248           | 0.199           | 0.263           | 0.244                           | 0.348 E-3        | 0.631 E-3        | 5.742 E-3        |
| 0.099            | 0.147            | 1.320 E-3                       | 0.762                            | 0.063 E-3       | 0.155           | 0.135           | 0.182           | 0.344           | 0.466                           | 1.022 E-3        | 0.772 E-3        | 4.047 E-3        |
| 0.256            | 0.156            | 1.892 E-3                       | 3.786                            | 0.050 E-3       | 0.354           | 0.193           | 0.155           | 0.777           | 0.067                           | 1.033 E-3        | 0.143 E-3        | 6.964 E-3        |
| 0.189            | 0.406            | 1.599 E-3                       | 1.313                            | 0.064 E-3       | 0.435           | 0.181           | 0.084           | 0.697           | 0.582                           | 0.482 E-3        | 0.944 E-3        | 5.345 E-3        |
| 0.222            | 0.325            | 2.366 E-3                       | 2.012                            | 0.104 E-3       | 0.449           | 0.209           | 0.122           | 0.625           | 0.395                           | 1.594 E-3        | 0.221 E-3        | 5.321 E-3        |
| 0.189            | 0.431            | 2.100 E-3                       | 1.532                            | 0.042 E-3       | 0.514           | 0.205           | 0.113           | 0.432           | 0.220                           | 1.360 E-3        | 0.176 E-3        | 7.643 E-3        |
| 0.231            | 0.038            | 1.602 E-3                       | 3.161                            | 0.073 E-3       | 0.604           | 0.142           | 0.174           | 0.299           | 0.128                           | 0.524 E-3        | 0.405 E-3        | 7.133 E-3        |
| 0.322            | 0.388            | 2.407 E-3                       | 3.200                            | 0.109 E-3       | 0.558           | 0.262           | 0.121           | 0.414           | 0.315                           | 0.949 E-3        | 1.570 E-3        | 8.421 E-3        |
| 0.180            | 0.458            | 1.934 E-3                       | 1.081                            | 0.062 E-3       | 0.162           | 0.144           | 0.062           | 0.314           | 0.455                           | 0.312 E-3        | 0.851 E-3        | 7.995 E-3        |
| 0.293            | 0.204            | 2.671 E-3                       | 1.528                            | 0.104 E-3       | 0.729           | 0.262           | 0.181           | 0.396           | 0.505                           | 0.173 E-3        | 1.228 E-3        | 7.827 E-3        |
| 0.201            | 0.305            | 1.302 E-3                       | 1.882                            | 0.105 E-3       | 0.699           | 0.161           | 0.133           | 0.531           | 0.263                           | 0.471 E-3        | 0.112 E-3        | 8.358 E-3        |
| 0.155            | 0.329            | 1.775 E-3                       | 3.535                            | 0.094 E-3       | 0.574           | 0.146           | 0.129           | 0.380           | 0.339                           | 1.410 E-3        | 1.373 E-3        | 3.252 E-3        |

## 8 I-V CURVES

**Table S4.** Maximum and minimum peak current values obtained from simulated I-V curves in Fig. S2, and comparison with experimental values reported in Aslanidi et al. (2009)(1) and Muraki et al. (1995)(2). Values are in pA/pF.

|                  | I-V curves |           |                  | 2 Hz Pacing |           |                |
|------------------|------------|-----------|------------------|-------------|-----------|----------------|
|                  | Simulated  |           | Experimental     | Our model   |           | Aslanidi model |
|                  | Min. peak  | Max. peak |                  | Min. peak   | Max. peak |                |
| I <sub>CaL</sub> | -13.9      | -4.3      | -8 (PM), -6 (CT) | -6.4        | -2.1      | -3.6           |
| I <sub>Na</sub>  | -737       | -291      | -70              | -393        | -192      | -120           |
| I <sub>to</sub>  | 3.4        | 16.6      | 13 (PM), 8 (CT)  | 0.87        | 4.0       | 1.3            |
| I <sub>K1</sub>  | 0.88       | 2.6       | 5 (PM), 4 (CT)   | 0.88        | 2.6       | 0.66           |
| I <sub>Kr</sub>  | 0.45       | 2.1       | 0.67*            | 0.41        | 2.4       | 0.43           |

\* Assuming a cell capacitance of 50 pF

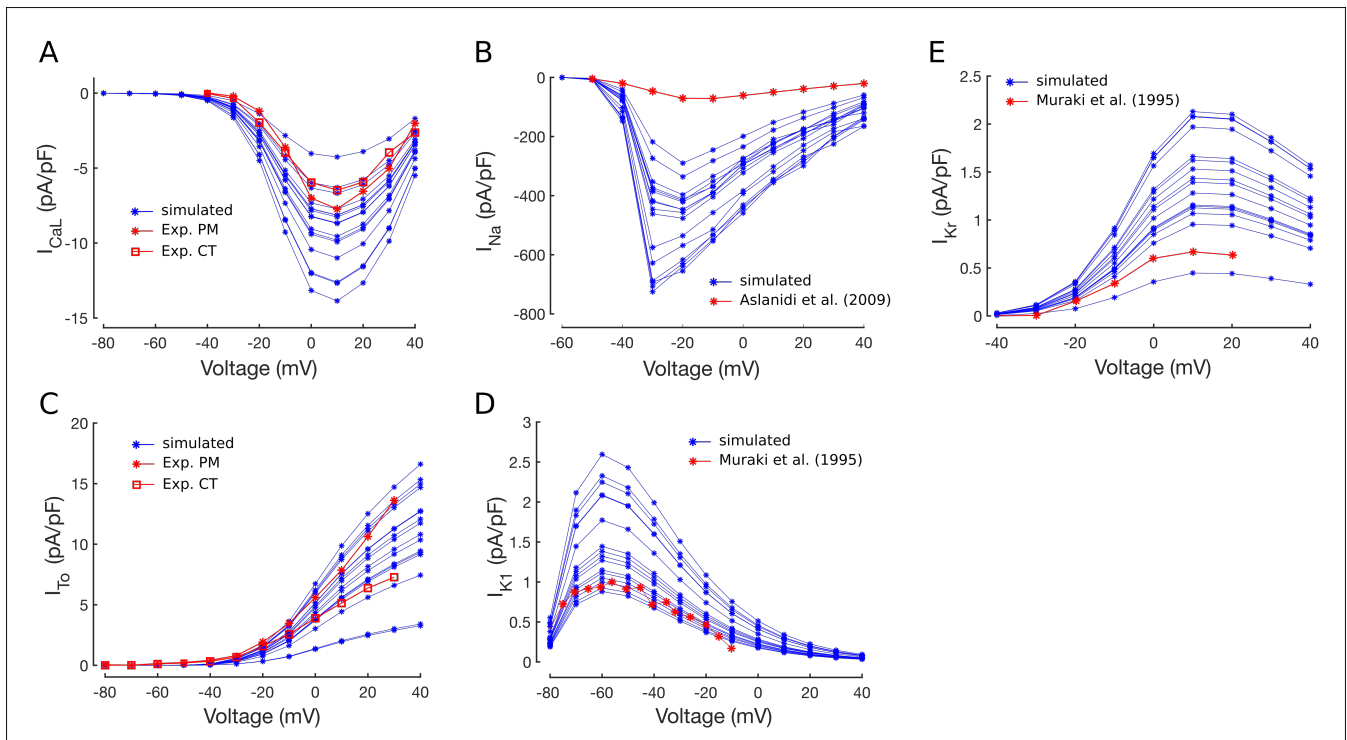

**Figure S2.** Simulated I-V curves (blue) of  $I_{CaL}$ ,  $I_{Na}$ ,  $I_{To}$ , and  $I_{K1}$  for the 16 models in the control population. The voltage-clamp protocol applied consisted of trains of 200 ms square depolarizing pulses at a cycle length of 2 s from a holding potential of  $-80$  mV to voltages between  $-80$  mV and  $40$  mV, in steps of  $10$  mV. Experimental I-V curves (red) are shown for comparison. In panels A and C, curves for both pectinate muscle (PM, stars) and crista terminalis (CT, squares) rabbit atrial CMs are shown (data from Aslanidi et al. (2009)). The experimental curve in panel D is normalized data, shown here for qualitative comparison purposes. The experimental curve in E assumed a cell capacitance of  $50$  pF.

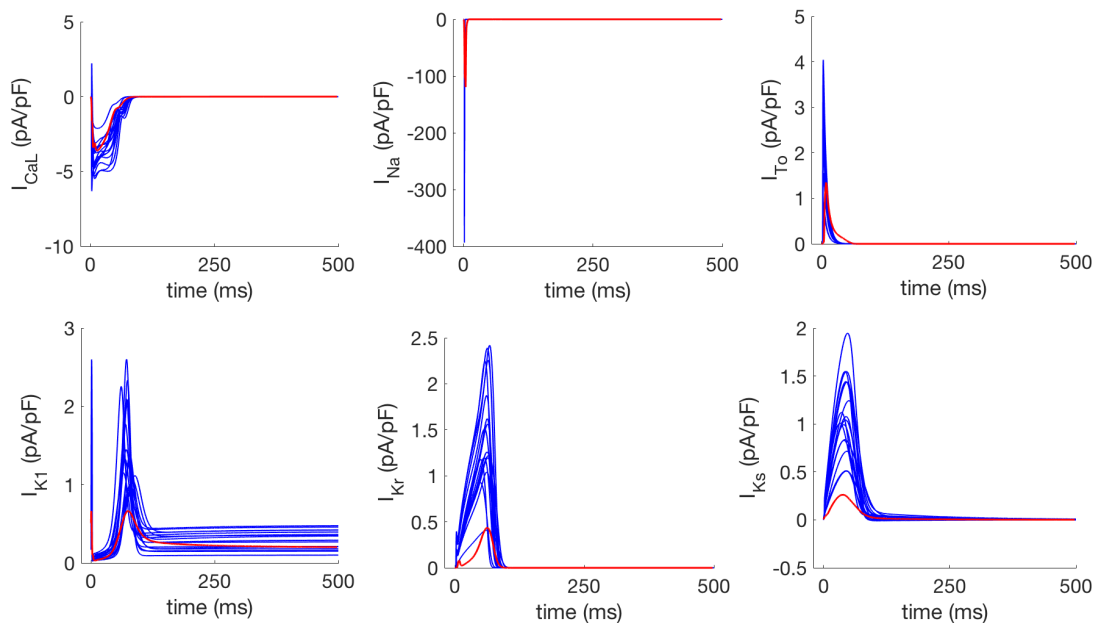

**Figure S3.** Comparison between  $I_{CaL}$ ,  $I_{Na}$ ,  $I_{To}$ ,  $I_{K1}$ ,  $I_{Kr}$ , and  $I_{Ks}$  obtained with our control population and with the Aslanidi model(1) (CellML version) at  $2$  Hz pacing.

## REFERENCES

- [1]Aslanidi et al. *Mechanisms of transition from normal to reentrant electrical activity in a model of rabbit atrial tissue: Interaction of tissue heterogeneity and anisotropy*, Biophysical Journal 96(3), 798-817, 2009.
- [2]Muraki et al. *Delayed rectifier  $K^+$  current in rabbit atrial myocytes*, Am J of Phys-Heart and Circ Phys 269(2), H524-H532, 1995.
